# Supplementary material for: The Biosocial Microbiome: Gender Identity, Geography, and Mucosal Microbial Phenotypes
Source: Research Square preprint supplement (doi:10.21203/rs.3.rs-8368158/v1), 2026-01-13
Supplement: Supplementary file 1 [file 7cfbe8240b13dc310545f289.docx]

**Supplemental Methods**

**Serum hormone measurement.** For the Atlanta cohort, serum was collected via SST tubes and cryopreserved for batch analyses. Serum hormone concentrations were quantified via Estradiol (DRG, #75871-318) and Testosterone (DRG, #75871-120) ELISA kits, according to manufacturer instructions. For the BKK cohorts, sex hormones were quantified via a standard clinical immunoassay-based hormone quantification method. A subset of BKK serum samples (n=41) were also analyzed with the DRG ELISAs in Atlanta; intraclass correlation coefficients (ICC) for estradiol (ICC=0.86) and testosterone (ICC=0.92) indicated intertest (lab-based ELISA versus clinical immunoassay) reliability.

**Microbiota sequencing**

DNA was extracted using the Qiagen DNeasy PowerSoil Pro Kit. Libraries were made using a modification of the Illumina 16S Metagenomic Sequencing Library Preparation workflow. 12.5 ng of DNA was amplified using 16S Amplicon PCR Forward and Reverse Primers. Libraries were purified with Ampure XP beads. Purified amplicons were indexed with Nextera XT Index primers, and indexed amplicons were purified with Ampure XP beads. Final 16S libraries were approximately 630 bp and were pooled in equal amounts based on fluorescence quantification. Final library pools were quantitated via qPCR. The pooled library was sequenced on an Illumina MiSeq using MiSeq v3 600 cycle chemistry at a loading density of 6–8 pM with 20% PhiX, generating roughly 20 million, 300 bp paired-end reads. Recommended sequencing depth was >100,000 reads per sample. Raw amplicon sequence reads were evaluated for quality control (QC) using FastQC v.0.12.0 and Fastq_Screen v.0.15.3 with MultiQC v1.22.3(1, 2) and were then processed using Quantitative Insights into Microbial Ecology (QIIME2 v2023.7)(3). The Divisive Amplicon Denoising Algorithm 2 (DADA2) package(4) was used within QIIME2 to denoise and dereplicate all paired-end sequences and to create the feature table of amplicon sequence variants used within QIIME2. DADA2 parameters were chosen to trim the first 30 bp and to truncate both paired-end reads at position 240 and to remove chimeric reads . Taxonomic assignment was performed via QIIME2 and the data were aligned to Silva (v132.1)(5) using the QIIME taxonomy modules.

**Statistical Methods**

Linear decomposition modeling (LDM)

LDM allows inclusion of multiple study groups and visits into a single model, controls for multiple comparisons, and is a single analysis pathway that combines both global test of effect as well as tests of individual outcomes(6, 7). The LDM essentially fit a linear model for the taxon relative abundance or taxon presence absence data as the outcome and regresses it on continuous traits or categorical group variables while adjusting for potential confounders; however, it differs from standard linear regression in that it uses permutation-based p values to account for non-normally distributed data. For these analyses, data were normalized to have mean zero and standard deviance of 1; missing data were imputed by the mean of the observed data.

Presence-absence analysis

Presence-absence analysis is the preferred analysis for identifying rare taxa. Many associations are driven by changes in which taxa are present and which are absent, however confounding by read depth is a limitation to this analysis. Our method of evaluating presence-absence involves first rarifying the ASV table such that all samples have the same library size, which eliminates confounding by read depth, and then repeatedly applying the LDM to all (i.e., infinitely) rarified taxa count tables(7).

References

1. Andrews S. Fast QC: a quality control tool for high throughput sequence data 2010 [Available from: <http://www.bioinformatics.babraham.ac.uk/projects/fastqc>.

2. Ewels P, Magnusson M, Lundin S, Käller M. MultiQC: summarize analysis results for multiple tools and samples in a single report. Bioinformatics. 2016;32(19):3047-8.

3. Bolyen E, Rideout JR, Dillon MR, Bokulich NA, Abnet CC, Al-Ghalith GA, et al. Reproducible, interactive, scalable and extensible microbiome data science using QIIME 2. Nat Biotechnol. 2019;37(8):852-7.

4. Callahan BJ, McMurdie PJ, Rosen MJ, Han AW, Johnson AJ, Holmes SP. DADA2: High-resolution sample inference from Illumina amplicon data. Nat Methods. 2016;13(7):581-3.

5. Quast C, Pruesse E, Yilmaz P, Gerken J, Schweer T, Yarza P, et al. The SILVA ribosomal RNA gene database project: improved data processing and web-based tools. Nucleic Acids Res. 2013;41(Database issue):D590-6.

6. Hu YJ, Satten GA. Testing hypotheses about the microbiome using the linear decomposition model (LDM). Bioinformatics. 2020;36(14):4106-15.

7. Hu YJ, Lane A, Satten GA. A rarefaction-based extension of the LDM for testing presence-absence associations in the microbiome. Bioinformatics. 2021.

**Supplemental Figures**


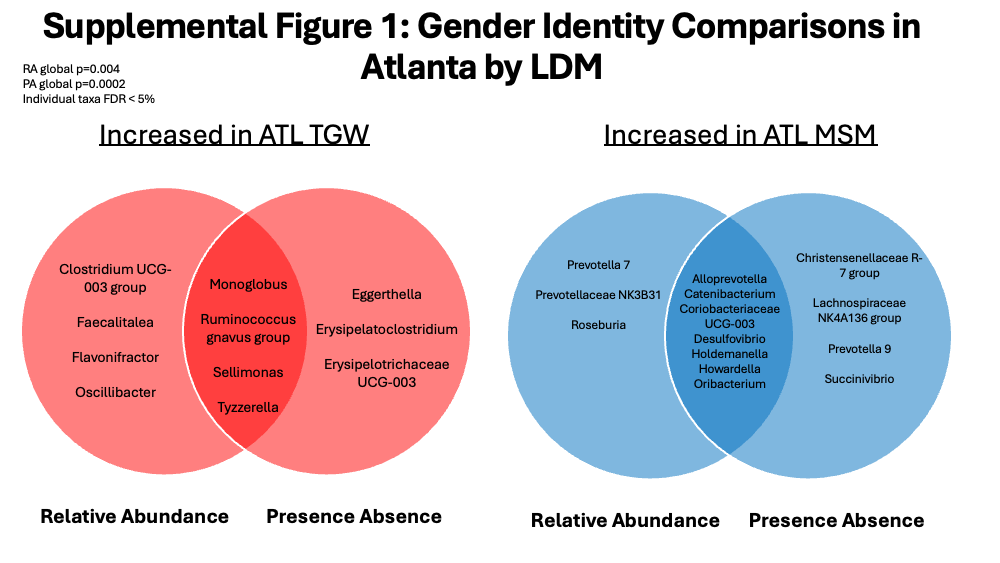
 **Supplemental Figure 1: Gender Identity Comparisons in Atlanta by LDM.** The rectal microbiota significantly differed between ATL TGW (transgender women in Atlanta; n=25) and ATL MSM (cisgender men who have sex with men in Atlanta; n=33) by relative abundance linear decomposition modeling (LDM; global p=0.004; 21 differentially-abundant taxa) and presence-absence LDM (global p=0.0002; 19 taxa with differential probability of presence). Alpha diversity was not significantly different (p=0.12). Unidentified and uncultured taxa are not included in this figure.


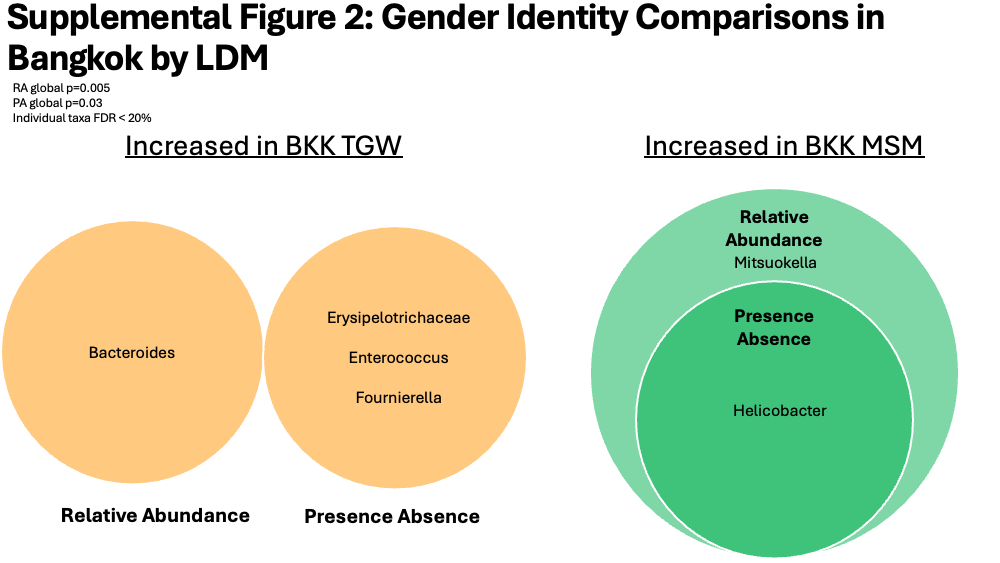
 **Supplemental Figure 2: Gender Identity Comparisons in Bangkok by LDM.** The rectal microbiota significantly differed between BKK TGW (transgender women in Bangkok; n=97) and BKK MSM (cisgender men who have sex with men in Bangkok; n=50) by relative abundance linear decomposition modeling (LDM; global p=0.005; 0 differentially-abundant taxa at FDR<5% and 3 differentially-abundant taxa with FDR<20%) and presence-absence LDM (global p=0.03; 0 differentially-abundant taxa at FDR<5% and 4 differentially-abundant taxa with FDR<20%). Alpha diversity was not significantly different (p=0.96).


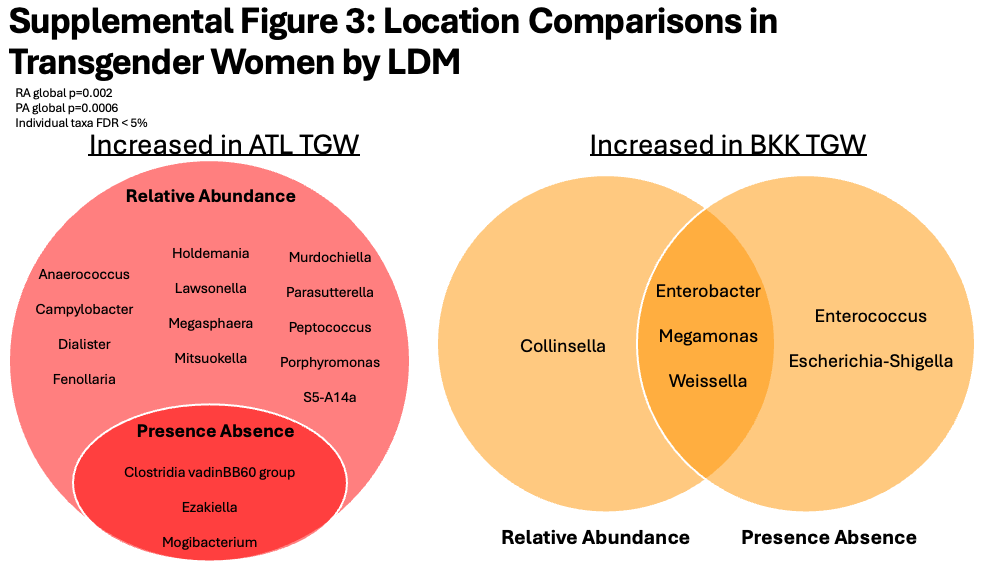


**Supplemental Figure 3: Location Comparisons in Transgender Women by LDM.** The rectal microbiota significantly differed between ATL TGW (transgender women in Atlanta; n=25) and BKK TGW (transgender women in Bangkok; n=97) by relative abundance linear decomposition modeling (LDM; global p=0.002; 20 differentially-abundant taxa) and presence-absence LDM (global p=0.0006; 8 taxa with differential probability of presence). Alpha diversity was not significantly different (p=0.052). Unidentified and uncultured taxa are not included in this figure.


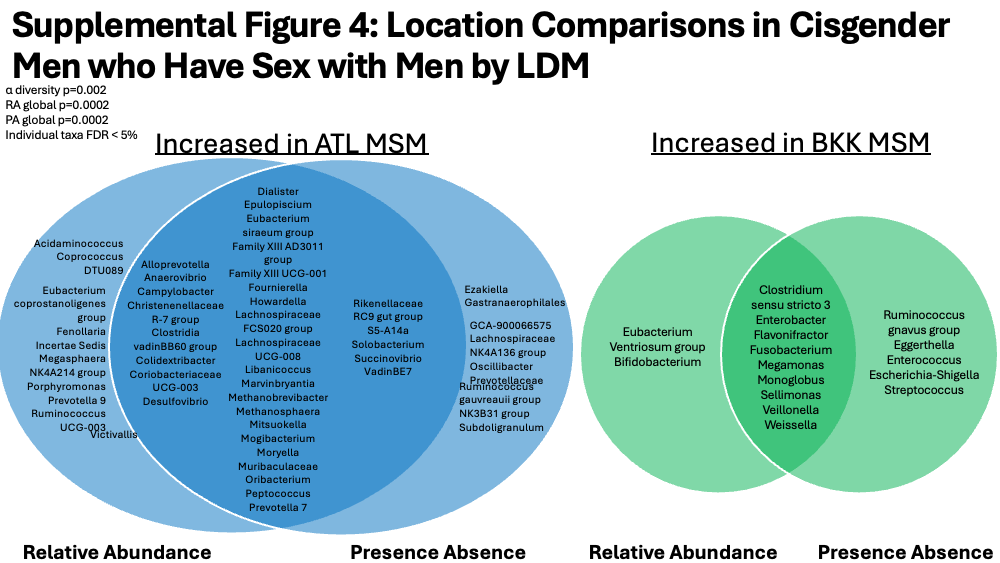


**Supplemental Figure 4: Location Comparisons in Cisgender Men who Have Sex with Men by LDM.** The rectal microbiota significantly differed between ATL MSM (cisgender men who have sex with men in Atlanta; n=33) and BKK MSM (cisgender men who have sex with men in Bangkok; n=50) by relative abundance linear decomposition modeling (LDM; global p=0.0002; 66 differentially-abundant taxa) and presence-absence LDM (global p=0.0006; 64 taxa with differential probability of presence). Alpha diversity was also significantly different (p=0.002). Unidentified and uncultured taxa are not included in this figure.


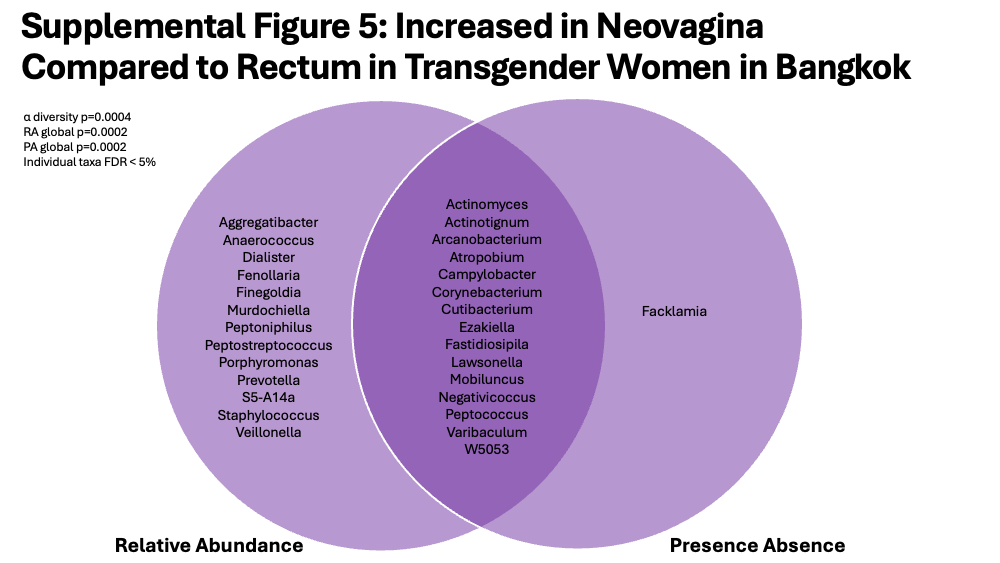


**Supplemental Figure 5: Increased in Neovagina Compared to Rectum in Transgender Women in Bangkok.** We compared the rectal (n=97) and neovaginal (n=13) microbiotas in a subset of transgender women in Bangkok. The microbiotas were globally significantly different by relative abundance linear decomposition modeling (LDM; global p=0.0002; 88 differentially-abundant taxa; 28 increased in the neovagina compared to the rectum) and presence-absence LDM (global p=0.0002; 86 taxa with differential probability of presence; 16 of these with increased probability of presence in the neovagina compared to the rectum). Alpha diversity was also significantly different (p=0.0004). Unidentified and uncultured taxa are not included in this figure.


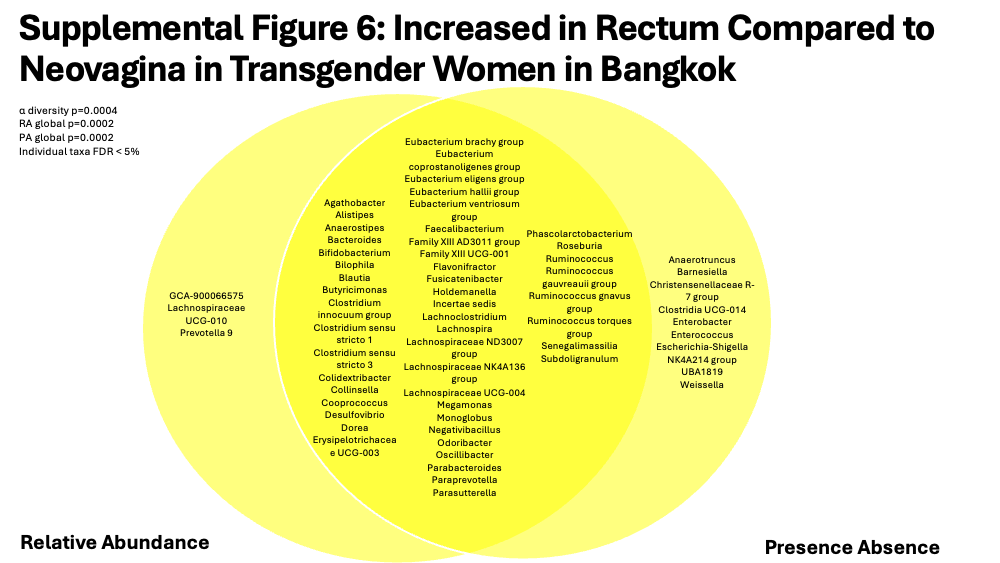


**Supplemental Figure 6: Increased in Rectum Compared to Neovagina in Transgender Women in Bangkok.** We compared the rectal (n=97) and neovaginal (n=13) microbiotas in a subset of transgender women in Bangkok. The microbiotas were globally significantly different by relative abundance linear decomposition modeling (LDM; global p=0.0002; 88 differentially-abundant taxa; 60 increased in the rectum compared to the neovagina) and presence-absence LDM (global p=0.0002; 86 taxa with differential probability of presence; 70 of these with increased probability of presence in the rectum compared to the neovagina). Alpha diversity was also significantly different (p=0.0004). Unidentified and uncultured taxa are not included in this figure.


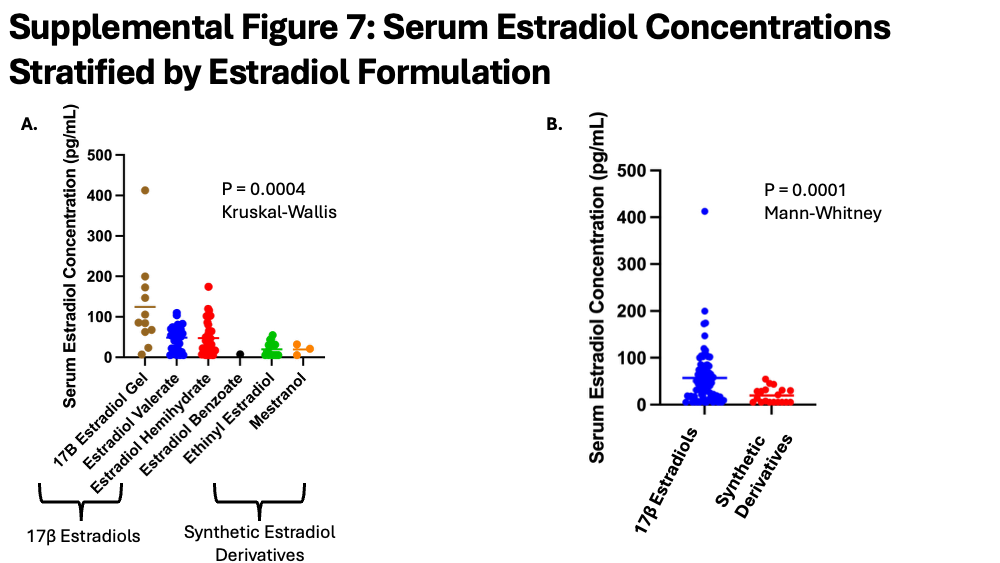


**Supplemental Figure 7: Serum Estradiol Concentrations Stratified by Estradiol Formulation**. (A) Depicts median serum estradiol concentrations for all TGW participants grouped by estradiol formulation. (B) Depicts median serum estradiol concentrations for all TGW participants grouped by bioidentical drug and prodrug versus synthetic estradiol derivative formulations.

**Supplemental Tables**

| **Taxa** | **R** | **P Value** |
| --- | --- | --- |
| Bacteroidaceae | 0.15 | 0.03 |
| Campylobacteraceae | 0.21 | 0.003 |
| Enterobacteriaceae | -0.14 | 0.04 |
| Pasteurellaceae | -0.19 | 0.008 |
| Porphyromonadaceae | 0.23 | 0.001 |
| Selenomonadaceae | -0.25 | 0.0003 |

**Supplemental Table 1: Serum Estradiol and Family Level Microbiome Relative Abundance - Significant Spearman Correlations.** These six phylogenetic families (of 39 total that were assessed) demonstrated significant (p<0.05) correlations between relative abundance and serum estradiol concentrations.

| **Taxa** | **R** | **P Value** |
| --- | --- | --- |
| Bacteroidaceae | -0.16 | 0.02 |
| Lactobacillaceae | -0.2 | 0.005 |
| Monoglobaceae | -0.2 | 0.007 |
| Porphyromonadaceae | -0.15 | 0.03 |
| Rikenellaceae | -0.2 | 0.004 |

**Supplemental Table 2: Serum Testosterone and Microbiome Relative Abundance - Significant Spearman Correlations.** These five phylogenetic families (of 39 total that were assessed) demonstrated significant (p<0.05) correlations between relative abundance and serum testosterone concentrations.
